# Supplementary material for: α-Lactalbumin peptide Asp-Gln-Trp alleviates hepatic insulin resistance and modulates gut microbiota dysbiosis in high-fat diet-induced NAFLD mice
Source: Royal Society of Chemistry journal article supplement (doi:10.1039/d2fo01343f), 2022-01-01
Supplement: d2fo01343f1.pdf [file d2fo01343f1.pdf]

### Supplementary material

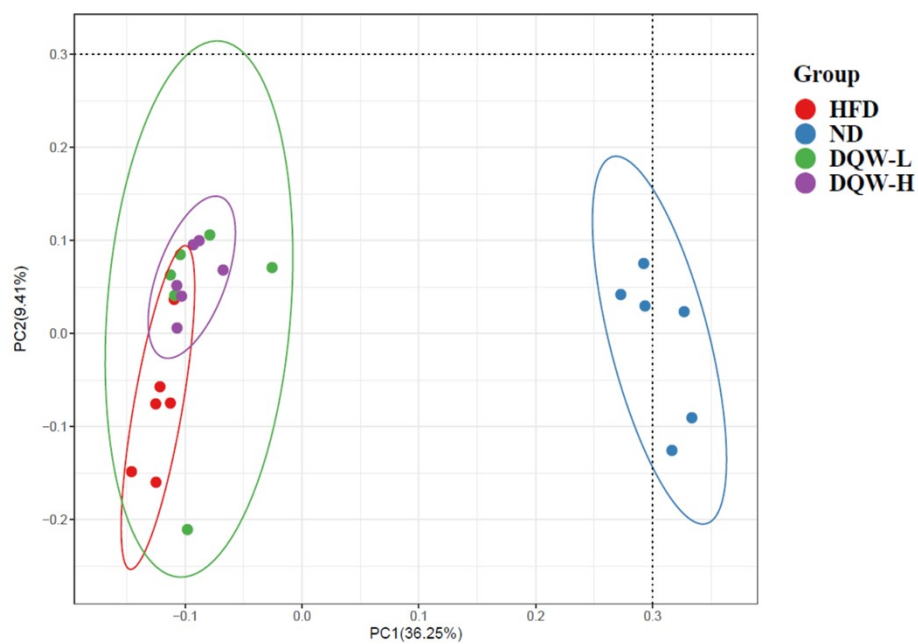

**Supplementary Figure 1.** The effect of peptide DQW on PCA score plot of gut microbiota in NAFLD mice.

**Supplementary Table 1.** The detailed diet ingredients of the mice diet.

| Ingredient           | Normal diet (gm%) | High-fat diet (gm%) |
|----------------------|-------------------|---------------------|
| Casein               | 200               | 200                 |
| L-Cystine            | 3                 | 3                   |
| Corn Starch          | 351               | 0                   |
| Maltodextrin         | 35                | 125                 |
| Sucrose              | 350               | 68.8                |
| Cellulose            | 50                | 50                  |
| Soybean oil          | 25                | 25                  |
| Lard                 | 20                | 245                 |
| Mineral Mix          | 10                | 10                  |
| Dicalcium phosphate  | 13                | 13                  |
| Calcium carbonate    | 5.5               | 5.5                 |
| Potassium citrate    | 16.5              | 16.5                |
| Vitamin Mix          | 10                | 10                  |
| Choline bitartrate   | 2                 | 2                   |
| Macronutrients:      |                   |                     |
| Protein (kcal%)      | 20                | 20                  |
| Carbohydrate (kcal%) | 70                | 20                  |
| Fat (kcal%)          | 10                | 60                  |
| Total (kcal/g)       | 3.85              | 5.24                |

**Supplementary Table 2.** The sequences of the primers in this study.

| Gene           | gene ID | Sequences of primers (5' - 3') | Size, bp |
|----------------|---------|--------------------------------|----------|
| PPAR $\alpha$  | 19013   | F: AGGCTGTAAGGGCTTCTTTC        | 100      |
|                |         | R: GCATTTGTTCCGGTTCTTCTTC      |          |
| IRS1           | 16367   | F: AATAGCCGTGGTGATTACAT        | 178      |
|                |         | R: CAGAAGCAGAAGCAGAGG          |          |
| PI3K           | 18708   | F: AAGGAGCTGGTGCTACATTATC      | 98       |
|                |         | R: CGCCTCTGTTGTGCATATACT       |          |
| AKT            | 11651   | F: ACGACGTAGCCATTGTGAAG        | 120      |
|                |         | R: GCCGTTCCCTTGTAGCCAATA       |          |
| GSK3 $\beta$   | 56637   | F: GAGGAGAGCCCAATGTTTCATA      | 107      |
|                |         | R: GCCTGCAGACCATACATCTATAC     |          |
| GLUT4          | 20528   | F: GTTTCTCCAACCTGGACCTGTAA     | 96       |
|                |         | R: GGACGGCAAATAGAAGGAAGA       |          |
| $\beta$ -actin | 11461   | F: GGCTGTATTCCCCTCCATCG        | 154      |
|                |         | R: CCAGTTGGTAACAATGCCATGT      |          |
